# Supplementary material
Source: ML conference proceedings conference paper supplement (https://openreview.net/forum?id=uJqxFjF1xWp)
Supplement: supplementary_material [file attachment]

# Appendix

Anonymous Author(s)

Affiliation

Address

email

## 1 Method

### 1.1 Coordinate transformation among LiDAR, camera and EGB image in DAIR-V2X dataset

If the LiDAR coordinate system is regarded as the world coordinate system, the 3D coordinate of point  $W$  could be:

$$W_{world} = \begin{bmatrix} x_{world} \\ y_{world} \\ z_{world} \end{bmatrix} \quad (1)$$

We also have the camera coordinate and image coordinate of point  $W$  as

$$W_{cam} = \begin{bmatrix} x_{cam} \\ y_{cam} \\ z_{cam} \end{bmatrix}, W_{img} = \begin{bmatrix} x_{img} \\ y_{img} \end{bmatrix} \quad (2)$$

Its world homogeneous coordinate in camera coordinate system and its camera homogeneous coordinate in image coordinate system are

$$W_{world.h} = \begin{bmatrix} x_{world} \\ y_{world} \\ z_{world} \\ 1 \end{bmatrix}, W_{img.h} = \begin{bmatrix} x_{img} \\ y_{img} \\ 1 \end{bmatrix} \quad (3)$$

Suppose that  $E$  is the transformation matrix from LiDAR coordinate system to camera coordinate system and  $I$  is the transformation matrix from camera coordinate system to image coordinate system, The inverse matrix of  $E$  and matrix  $I$  are

$$E_{4 \times 4}^{-1} = \begin{bmatrix} r_{x1} & r_{y1} & r_{z1} & t_x \\ r_{x2} & r_{y2} & r_{z2} & t_y \\ r_{x3} & r_{y3} & r_{z3} & t_z \\ 0 & 0 & 0 & 1 \end{bmatrix}, I_{3 \times 3} = \begin{bmatrix} f_x & 0 & u \\ 0 & f_y & v \\ 0 & 0 & 1 \end{bmatrix} \quad (4)$$

Generally,  $E$  and  $I$  are the extrinsic matrix and intrinsic matrix of camera, which are given by dataset [1].

Then we have

$$W_{cam.h} = E_{4 \times 4} * W_{world.h}, W_{img} = \frac{1}{z_{cam}} * I_{3 \times 3} * W_{cam} \quad (5)$$

### 1.2 Generate preference map

We visualize four typical cases when generating one cell of preference map, which are shown in Fig 1.

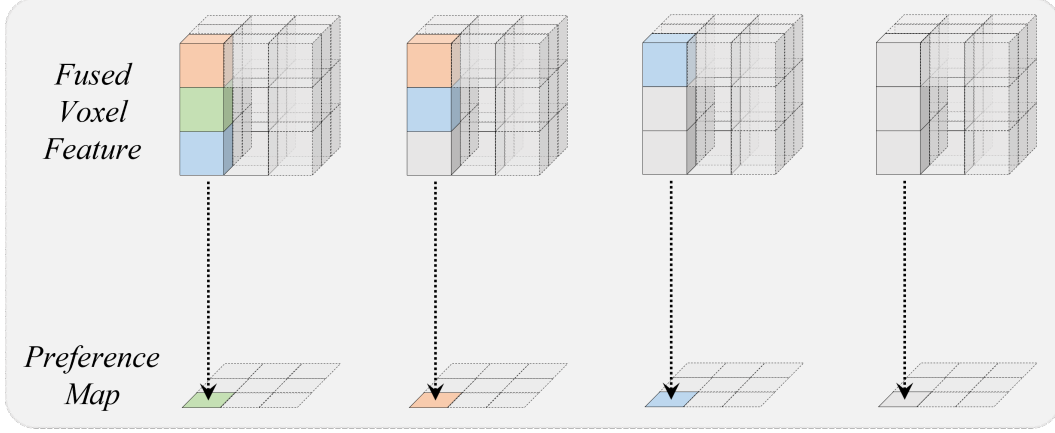

Figure 1: Four typical cases when generating one cell of preference map.

## 2 Experiments

### 2.1 Detailed settings of architecture

We follow the default settings in OpenCOOD [2] codebase, which is also shown in Tab 2.

Table 1: Details of unified network architecture.

| Blocks                      | Settings                                                                                                                                               |
|-----------------------------|--------------------------------------------------------------------------------------------------------------------------------------------------------|
| Voxel Feature Encoder (VFE) | use normalization and absolute 3D coordinates, 64 filters                                                                                              |
| PointPillar Scatter         | 64-channel output                                                                                                                                      |
| BEV backbone                | ResNet backbone with ordered layers=[3, 4, 5], strides=[2, 2, 2], filters=[64, 128, 256], upsample_strides=[1, 2, 4], upsample_filters=[128, 128, 128] |
| Shrink Header               | shrink from 384 channels to 256 channels with stride 3                                                                                                 |
| Detect Head                 | 256-channel output with 2 anchors                                                                                                                      |

### 2.2 Detailed settings of experiments

Table 2: Details of unified network architecture.

| Method                  | optimizer | lr schedule | initial lr |
|-------------------------|-----------|-------------|------------|
| No Fusion               | Adam      | multistep   | 1e-3       |
| Late Fusion             | Adam      | multistep   | 1e-3       |
| When2com (CVPR'20)      | Adam      | multistep   | 1e-3       |
| V2VNet (ECCV'20)        | Adam      | multistep   | 1e-3       |
| DiscoNet (NeurIPS'21)   | Adam      | multistep   | 2e-3       |
| CoBEVT (CoRL'22)        | Adam      | multistep   | 2e-3       |
| V2X-ViT (ECCV'22)       | Adam      | multistep   | 2e-3       |
| Where2comm (NeurIPS'22) | Adam      | multistep   | 2e-3       |
| BM2CP                   | Adam      | multistep   | 1e-3       |

### 2.3 More Visualizations

Fig 2 shows more comparisons with *No Fusion*, *V2X-ViT* and *Where2comm*.

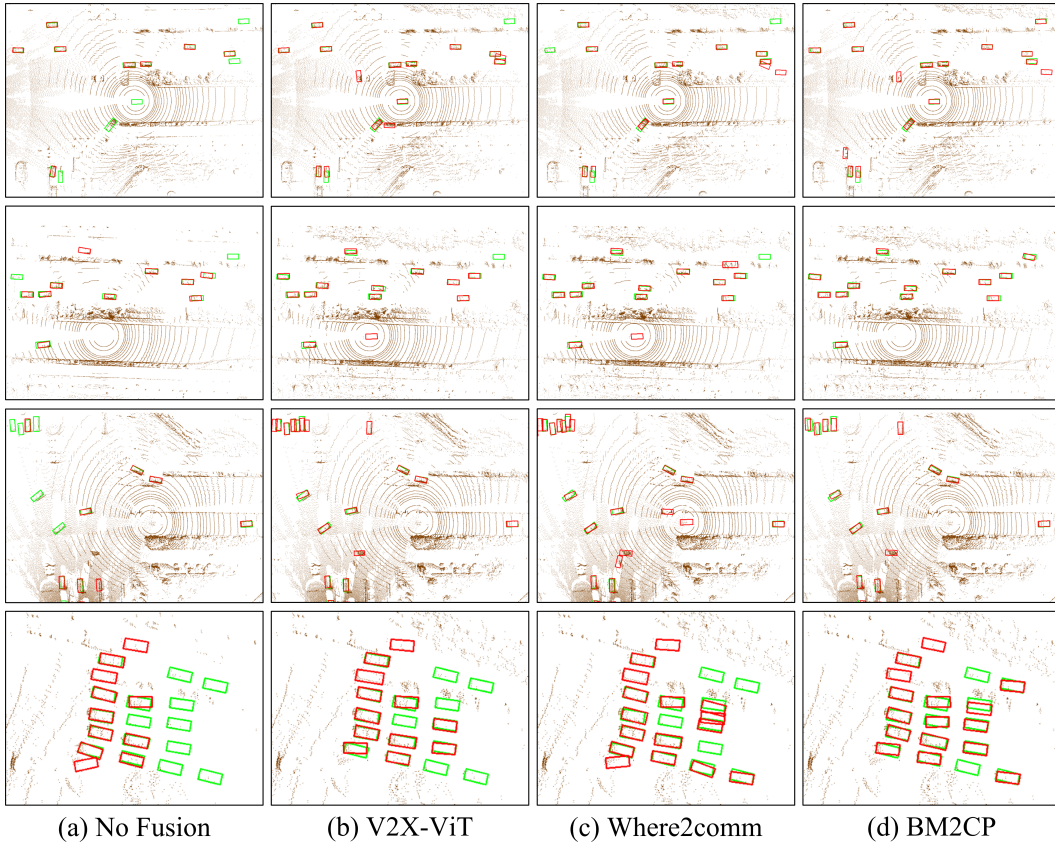

Figure 2: More qualitative results in DAIR-V2X dataset. Ground truths are colored in green and predictions are colored in red.

24 **References**

- 25 [1] H. Yu, Y. Luo, M. Shu, Y. Huo, Z. Yang, Y. Shi, Z. Guo, H. Li, X. Hu, J. Yuan, et al. Dair-v2x: A  
26 large-scale dataset for vehicle-infrastructure cooperative 3d object detection. In *Proceedings of*  
27 *the IEEE/CVF Conference on Computer Vision and Pattern Recognition*, pages 21361–21370,  
28 2022.
- 29 [2] R. Xu, H. Xiang, X. Xia, X. Han, J. Li, and J. Ma. Opv2v: An open benchmark dataset and  
30 fusion pipeline for perception with vehicle-to-vehicle communication. In *2022 International*  
31 *Conference on Robotics and Automation (ICRA)*, pages 2583–2589. IEEE, 2022.
